# Supplementary material
Source: PubMed Central journal article supplement (PMC3703986)
Supplement: 1301849110_pnas.201301849SI.pdf [file 1301849110_pnas.201301849SI.pdf]

# Supporting Information

Wang et al. 10.1073/pnas.1301849110

## SI Materials and Methods

**C. elegans Strains and Genetics.** *C. elegans* strains were raised on NGM (Nematode Growth Medium) plate seeded with the *Escherichia coli* strain OP50 at 20 °C using standard methods. Wild-type animals were of the Bristol variety, strain N2. Strains are listed in Table S1. Integrated *Pmec-4::gfp* (*zdIs5*), *Pgcy-32::mCherry* (*casIs35*), and *Pgcy-32::gfp* (*casIs35*) transgenes were used to visualize Q-neuroblast progenies, AVM/PVM and AQR/PQR. Ethyl methane sulfonate mutagenesis was carried out, with either a single transgenic marker or both, to identify Q-cell migration mutations. Four mutations affecting AQR and AVM migration were isolated and mapped with snip-SNP techniques and complementation testing. The candidate genes in these regions were sequenced to identify mutations. The data showed that these four alleles caused point mutations in or deletion of the *mig-13* gene.

**Molecular Biology and Transgenesis.** We used PCR fusion and molecular cloning techniques to generate fluorescence reporters in Q cells. All of the PCRs were performed with Phusion DNA polymerase (New England Biolabs). The PCR templates and primers are listed Table S2 and the plasmid constructs are listed in Table S3. Transgenic *C. elegans* were created by germ-line transformation. The PCR products and DNA plasmids at 10–30 ng/μL were injected into N2 hermaphrodites with a selection marker *prf4* or *unc-76* (*e911*) with WT *unc-76* gene.

**Live-Cell Imaging.** *C. elegans* L1 larva were anesthetized with 0.1 mmol/L levamisole in M9 buffer, and then mounted on 2% (wt/vol) agar pads and maintained at room temperature (20 °C). Our imaging system includes an Axio Observer Z1 microscope (Carl

Zeiss MicroImaging) equipped with a 100×, 1.45 N.A. objective, an EM CCD camera (Andor iXon+ DU-897D-C00-#BV-500), and the 405-, 488-, and 568-nm lines of a Sapphire CW CDRH USB Laser System attached to a spinning disk confocal scan head (Yokogawa CSU-X1 Spinning Disk Unit). Time-lapse images were acquired with exposure time of 300 ms at every 40–60 s with  $\mu$ Manager ([www.micro-manager.org](http://www.micro-manager.org)) or Focus Image software (developed by Xiang Zhang at the Institute of Biophysics, Chinese Academy of Sciences, Beijing, China). ImageJ software (<http://rsbweb.nih.gov/ij/>) was used to process the images.

**Statistical Analysis.** The Student *t* test was used to examine significant differences in Q-cell migration between WT and migration mutants as indicated in the figure legends.

**Quantification of Relative Position of Q Cells.** The positions of the Q-cell progenies in adult *C. elegans* reflect the outcomes of Q-cell migration. We thus quantified the final positions of Q-cell progenies in the adult stage. We chose three nonmotile cells, URX, PLM, and PVM, which can be labeled by either *Pmec-4::gfp* or *Pgcy-32::mCherry*, as fiduciary markers (Fig. S3A). For example, the relative position of AQR is calculated as the distance between URX and AQR divided by the distance between URX and PLM (Fig. S3A).

**LIN-39 and MAB-5 Binding Peaks Display.** IGB (Integrated Genome Browser 6.7.3) was used to analyze LIN-39 and MAB-5 binding peaks to *mig-13* or *lin-39* promoters. The ChIP-Seq data were downloaded from the modENCODE Consortium ([www.modencode.org](http://www.modencode.org)).

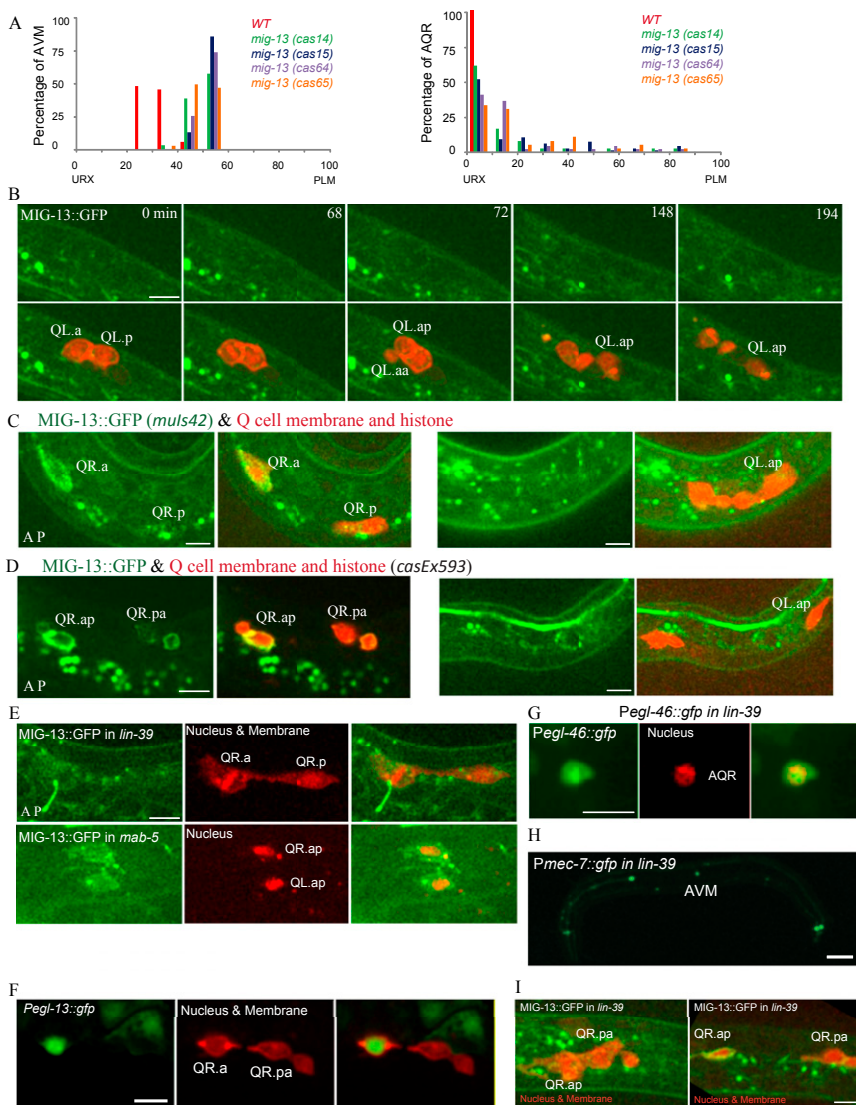

**Fig. 51.** MIG-13 and LIN-39 expression and localization in Q-cell lineage. (A) AVM (Left) and AQR (Right) migration defects in four new alleles of *mig-13*.  $n = 23$ –47. Quantifications are described in Fig. S3A and *Materials and Methods*. (B–D) Still images of MIG-13::GFP in Q cells using different strains: *muls62* (B), *muls42* (C), and *casEx593* (D). Time on the Right top is in minutes. (E) MIG-13::GFP expression in *lin-39* ( $n1760$ , Upper) and *mab-5* ( $e2088$ , Lower) mutants. (F) *Pegl-13::gfp* expression pattern (green) in the Q-cell (mCherry, red) lineages. (Scale bar, 5  $\mu$ m.) (G and H) The expression of *Pegl-46* (G) and *Pmec-7* (H) in *lin-39* ( $n1760$ ) mutants. (Scale bars: in B–G, 5  $\mu$ m; in H, 50  $\mu$ m.) (I) MIG-13::GFP in *lin-39* ( $n1760$ ) mutants. In QR.ap (AQR) without MIG-13::GFP, QR.ap stayed close to QR.pa (mother cell of AVM) (Left), whereas QR.ap with MIG-13::GFP was more anterior than QR.pa (Right).





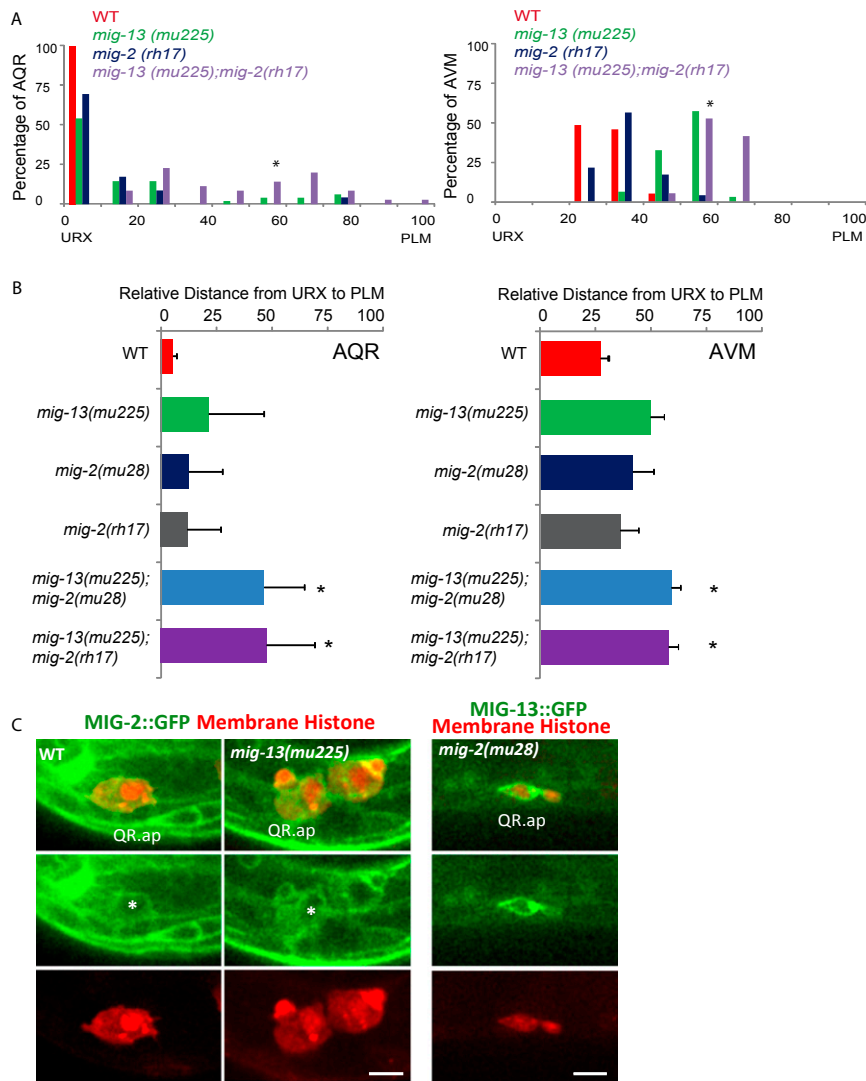

**Fig. 54.** Genetic interactions between *mig-2* and *mig-13*. (A) Quantifications of AQR and AVM positions in *mig-13* and *mig-2*-related genetic backgrounds (indicated on Top Right). (B) Statistical analysis of AQR and AVM positions in the single or double mutants of *mig-13* or *mig-2*. (C) The expression of P*mig-2::gfp* in WT and *mig-13* mutants (Left) or P*mig-13::gfp* in *mig-2* mutants (Right). (Scale bar, 5  $\mu$ m.)

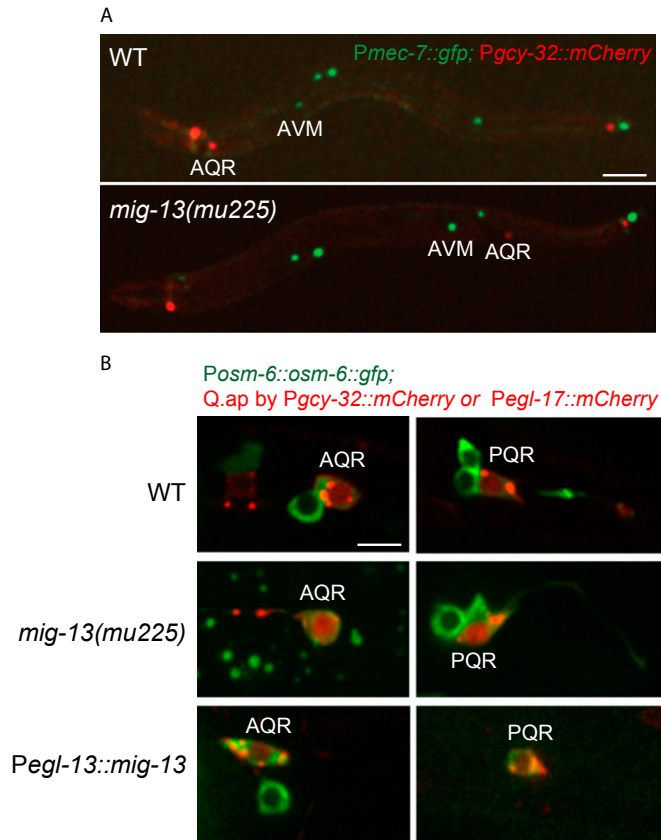

**Fig. 55.** Q-cell fate in WT and *mig-13*-related mutants. (A) The expression of *Pmec-7::gfp* and *Pgcy-32::mCherry* in WT and *mig-13* mutants (Left). (Scale bar, 50  $\mu$ m.) (B) The expression of *Posm-6::osm-6::gfp* in WT and *mig-13* loss or gain-of function mutants (Left). (Scale bar, 5  $\mu$ m.)



**Table S1. *C. elegans* strains used in this study**

| Strain name | Genotype                                                                                                                                                                    | Method                    | Resource           | Reference                               |
|-------------|-----------------------------------------------------------------------------------------------------------------------------------------------------------------------------|---------------------------|--------------------|-----------------------------------------|
| GOU246      | <i>zds5[Pmec-4::GFP];casIs35[Pgcy-32::mCherry];him-5(e1490)</i>                                                                                                             | Injection and cross       | CGC and this study | Fig. 1C                                 |
| GOU191      | <i>mig-13(cas14); zds5[Pmec-4::GFP];casIs35[Pgcy-32::mCherry]</i>                                                                                                           | EMS                       | This study         | Fig. 1D and Fig. S1A                    |
| GOU192      | <i>mig-13(cas15); zds5[Pmec-4::GFP];casIs35[Pgcy-32::mCherry]</i>                                                                                                           | EMS                       | This study         | Fig. 1D and Fig. S1A                    |
| GOU655      | <i>mig-13(cas64); zds5[Pmec-4::GFP];casIs35[Pgcy-32::mCherry]</i>                                                                                                           | EMS                       | This study         | Fig. 1D and Fig. S1A                    |
| GOU656      | <i>mig-13(cas65); zds5[Pmec-4::GFP];casIs35[Pgcy-32::mCherry]</i>                                                                                                           | EMS                       | This study         | Fig. 1D and Fig. S1A                    |
| CF726       | <i>mig-13(mu225)</i>                                                                                                                                                        |                           | CGC                | Fig. 1E                                 |
| CF1295      | <i>mig-13(mu225);lin-15B(n765);muls62[MIG-13::GFP + lin-15(+)]</i>                                                                                                          |                           | CGC                | Fig. 1F                                 |
| GOU649      | <i>casEx593[Pmig-13::MIG-13::TEV-S::GFP::mig-13_3'UTR+unc-76(+); Pegl-17::Myri-mcherry::pie-1 3'UTR;Pegl-17::mcherry-TEV-S::his-24]; unc-76(e911)</i>                       | Injection                 | This study         | Fig. S1D and Movie S2                   |
| GOU648      | <i>casEx790[Pmig-13::mouse_MIG-13::GFP,pRF4];mig-13(mu225); zds5[Pmec-4::GFP]</i>                                                                                           | Injection                 | CGC and this study | Fig. 1E and Fig. S3B                    |
| GOU646      | <i>casEx788[Pegl-17::mouse_MIG-13::GFP,pRF4];mig-13(mu225); zds5[Pmec-4::GFP]</i>                                                                                           | Injection                 | CGC and this study | Fig. 1E and Fig. S3B                    |
| GOU263      | <i>muls62[MIG-13::GFP + lin-15(+)]; rdvIs1[Pegl-17::Myri-mcherry::pie-13'UTR, Pegl-17::mig-10::YFP::unc-543'UTR, Pegl-17::mcherry-TEV-S::his-24,pRF4]</i>                   | Cross                     | CGC and this study | Fig. 1F and G, Fig. S1B, and Movie S1   |
| GOU560      | <i>muls42[MIG-13::GFP + lin-15(+)]; rdvIs1[Pegl-17::Myri-mcherry::pie-13'UTR, Pegl-17::mig-10::YFP::unc-543'UTR, Pegl-17::mcherry-TEV-S::his-24,pRF4]</i>                   | Cross                     | CGC and this study | Fig. S1C                                |
| GOU644      | <i>lin-39(n1760);zds5[Pmec-4::GFP];casIs35[Pgcy-32::mCherry]</i>                                                                                                            | Cross                     | CGC and this study | Fig. 4D and Fig. S3E                    |
| GOU652      | <i>lin-39(n1760);zds5[Pmec-4::GFP];casIs35[Pgcy-32::mCherry]; casEx600[Pegl-46::mig-13]</i>                                                                                 | Injection and cross       | CGC and this study | Fig. 4D and Fig. S3E                    |
| GOU653      | <i>lin-39(n1760);zds5[Pmec-4::GFP];casIs35[Pgcy-32::mCherry]; casEx1129[Pmec-7::mig-13::GFP]</i>                                                                            | Injection and cross       | CGC and this study | Fig. 4D and Fig. S3E                    |
| GOU536      | <i>lin-39(n1760); rdvIs1[Pegl-17::Myri-mcherry::pie-1 3'UTR, Pegl-17::mig-10::YFP::unc-54 3'UTR, Pegl-17::mcherry-TEV-S::his-24, pRF4]; muls62[MIG-13::GFP + lin-15(+)]</i> | Cross                     | CGC and this study | Fig. 1G and Fig. S1E                    |
| GOU680      | <i>mab-5(e2088); muls62[MIG-13::GFP]; casIs131[Pegl-17::mcherry::zen-4]</i>                                                                                                 | Injection and cross       | CGC and this study | Fig. 1G and Fig. S1E                    |
| GOU745      | <i>mig-14(mu71); muls62[MIG-13::GFP]; casIs131[Pegl-17::mcherry::zen-4]</i>                                                                                                 | Injection and cross       | CGC and this study | Fig. 1G                                 |
| GOU650      | <i>casEx779[Pegl-13::mig-13];mig-13(cas15);zds5[Pmec-4::GFP]; casIs35[Pgcy-32::mCherry]</i>                                                                                 | Injection                 | This study         | Fig. 2B–D and Fig. S3C and D            |
| GOU551      | <i>casEx596[Pgcy-32::mig-13];mig-13(cas15);zds5[Pmec-4::GFP]; casIs35[Pgcy-32::mCherry]</i>                                                                                 | Injection                 | This study         | Fig. 2B–D and Fig. S3C and D            |
| GOU544      | <i>casEx600[Pegl-46::mig-13];mig-13(cas15);zds5[Pmec-4::GFP]; casIs35[Pgcy-32::mCherry]</i>                                                                                 | Injection                 | This study         | Fig. 2B–D and Fig. S3C and D            |
| GOU651      | <i>casEx1129[Pmec-7::MIG-13::GFP];mig-13(cas15);zds5[Pmec-4::GFP]; casIs35[Pgcy-32::mCherry]</i>                                                                            | Injection                 | This study         | Fig. 2B–D and Fig. S3C and D            |
| GOU347      | <i>casIs49[Pegl-17::Myri-mcherry::pie-1 3'UTR, Pegl-17::COR-1::GFP::unc-54 3'UTR, Pegl-17::mcherry-TEV-S:: his-24]</i>                                                      | Injection and integration | This study         | Fig. 3A, D, and E, and Movies S3 and S8 |
| GOU422      | <i>mig-13(cas15);casIs49[Pegl-17::Myri-mcherry::pie-1 3'UTR, Pegl-17::COR-1::GFP::unc-54 3'UTR, Pegl-17::mcherry-TEV-S:: his-24]</i>                                        | Cross                     | This study         | Fig. 3B, D, and E, and Movie S7         |
| GOU482      | <i>casIs126[Pegl-13::mig-13]; casIs49[Pegl-17::Myri-mcherry::pie-1 3'UTR, Pegl-17::COR-1::GFP::unc-54 3'UTR, Pegl-17::mcherry-TEV-S::his-24]</i>                            | Cross                     | This study         | Fig. 3C–E, Fig. S2E, and Movie S9       |
| GOU785      | <i>casIs131[Pegl-17::mcherry::zen-4]; wglIs18[LIN-39::GFP]</i>                                                                                                              | Injection and cross       | CGC and this study | Fig. 5A and B, Movies S11 and S12       |
| GOU855      | <i>casEx831[Pmec-7::lin-39::GFP]; zds5[Pmec-4::GFP];casIs35 [Pgcy-32::mCherry]</i>                                                                                          | Injection and cross       | This study         | Fig. 5C and D                           |
| GOU856      | <i>casEx832[Pgcy-32::lin-39::GFP]; zds5[Pmec-4::GFP];casIs35 [Pgcy-32::mCherry]</i>                                                                                         | Injection and cross       | This study         | Fig. 5C and D                           |
| GOU857      | <i>casEx833[Pegl-13::lin-39::GFP] zds5[Pmec-4::GFP];casIs35 [Pgcy-32::mCherry]</i>                                                                                          | Injection and cross       | This study         | Fig. 5C and D                           |
| GOU802      | <i>casEx816[dePmig-13A::mig-13::GFP]; mig-13(mu225); zds5[Pmec-4::GFP];casIs35[Pgcy-32::mCherry]</i>                                                                        | Injection and cross       | This study         | Fig. 4C                                 |

Table S1. Cont.

| Strain name | Genotype                                                                                                                                                                                                                                                      | Method                            | Resource           | Reference                    |
|-------------|---------------------------------------------------------------------------------------------------------------------------------------------------------------------------------------------------------------------------------------------------------------|-----------------------------------|--------------------|------------------------------|
| GOU800      | <i>casEx813[dePmig-13B::MIG-13::GFP]; mig-13(mu225); zds5[Pmec-4::GFP]; casIs35[Pgcy-32::mCherry]</i>                                                                                                                                                         | Injection and cross               | This study         | Fig. 4C                      |
| GOU801      | <i>casEx814[dePmig-13C::mig-13::GFP]; mig-13(mu225); zds5[Pmec-4::GFP]; casIs35[Pgcy-32::mCherry]</i>                                                                                                                                                         | Injection and cross               | This study         | Fig. 4C                      |
| GOU854      | <i>casEx828[Del_motif::MIG-13::GFP]; mig-13(mu225); zds5[Pmec-4::GFP]; casIs35[Pgcy-32::mCherry]</i>                                                                                                                                                          | Injection and cross               | This study         | Fig. 4C                      |
| GOU783      | <i>mab-5(e2088); casIs131[Pegl-17::mcherry::zen-4]; wglS18[LIN-39::GFP]</i>                                                                                                                                                                                   | Injection and cross               | CGC and this study | Fig. 5B                      |
| GOU786      | <i>mig-14(mu71); casIs131[Pegl-17::mcherry::zen-4]; wglS18[LIN-39::GFP]</i>                                                                                                                                                                                   | Injection and cross               | CGC and this study | Fig. 5B                      |
| GOU350      | <i>mig-2(rh17); casIs49[Pegl-17::Myri-mcherry::pie-1 3' UTR, Pegl-17::COR-1::GFP::unc-54 3' UTR, Pegl-17::mcherry-TEV-S::his-24]</i>                                                                                                                          | Injection and integration         | CGC and this study | Fig. S2B and Movie S5        |
| GOU420      | <i>ina-1(gm144); casIs48[Pegl-17::Myri-mcherry::pie-1 3' UTR, Pegl-17::COR-1::GFP::unc-54 3' UTR, Pegl-17::mcherry-TEV-S::his-24]</i>                                                                                                                         | Injection and integration         | CGC and this study | Fig. S2C and Movie S6        |
| GOU746      | <i>casEx788[Pegl-17::mig-13::GFP]; mig-13(mu225); zds5[Pmec-4::GFP]; casIs35[Pgcy-32::mCherry]</i>                                                                                                                                                            | Injection and cross               | This study         | Fig. S3D                     |
| GOU944      | <i>casEx5002[Punc-47::MIG-13::GFP]; zds5[Pmec-4::GFP]; mig-13(mu225) casIs35[Pgcy-32::mCherry]</i>                                                                                                                                                            | Injection and cross               | CGC and this study | Fig. 2 B and C, and Fig. S3C |
| GOU945      | <i>casEx5003[Punc-47::MIG-13::GFP]; zds5[Pmec-4::GFP]; mig-13(mu225) casIs35[Pgcy-32::mCherry]</i>                                                                                                                                                            | Injection and cross               | CGC and this study | Fig. 2 B and C, and Fig. S3C |
| GOU890      | <i>mig-2(mu28); casIs49[Pegl-17::Myri-mcherry::pie-1 3' UTR, Pegl-17::COR-1::GFP::unc-54 3' UTR, Pegl-17::mcherry-TEV-S::his-24]</i>                                                                                                                          | Injection and cross               | CGC and this study | Fig. S2A and Movie S4        |
| GOU971      | <i>mig-2(mu28) casIs35[Pgcy-32::mCherry]; zds5[Pmec-4::GFP]</i>                                                                                                                                                                                               | Cross                             | CGC and this study | Fig. 3F and Fig. S4 A and B  |
| GOU976      | <i>mig-2(mu28) mig-13(mu225) casIs35[Pgcy-32::mCherry]; zds5[Pmec-4::GFP]</i>                                                                                                                                                                                 | Cross                             | CGC and this study | Fig. 3F and Fig. S4B         |
| GOU1004     | <i>mig-2(rh17) casIs35[Pgcy-32::mCherry]; zds5[Pmec-4::GFP]</i>                                                                                                                                                                                               | Cross                             | CGC and this study | Fig. S4 A and B              |
| GOU1005     | <i>mig-2(rh17) mig-13(mu225) casIs35[Pgcy-32::mCherry]; zds5[Pmec-4::GFP]</i>                                                                                                                                                                                 | Cross                             | CGC and this study | Fig. S4 A and B              |
| GOU1006     | <i>mig-2(mu28) casIs35[Pgcy-32::mCherry]; casIs222[Pmig-13::MIG-13::MYC::GFP Pegl-17 &gt; Myri-mcherry &gt; pie-1 3' UTR, Pegl-17 &gt; mcherry-TEV-S::his-24]</i>                                                                                             | Injection, integration, and cross | CGC and this study | Fig. S4C                     |
| GOU963      | <i>mig-13(mu225) casIs35[Pgcy-32::mCherry]; muls28[MIG-2::GFP];</i>                                                                                                                                                                                           | Cross                             | CGC and this study | Fig. S4C                     |
| GOU988      | <i>lin-39(n1760); casIs48[Pegl-17::Myri-mcherry::pie-1 3' UTR, Pegl-17::COR-1::GFP::unc-54 3' UTR, Pegl-17::mcherry-TEV-S::his-24]; rdvIs1[Pegl-17::Myri-mcherry::pie-13' UTR, Pegl-17::mig-10::YFP::unc-54 3' UTR, Pegl-17::mcherry-TEV-S::his-24, pRF4]</i> | Cross                             | CGC and this study | Fig. 4A and Movie S10        |
| GOU953      | <i>lin-39(n1760); muls32[Pmec-7::GFP];</i>                                                                                                                                                                                                                    | Cross                             | CGC and this study | Fig. S1H                     |
| GOU954      | <i>lin-39(n1760); casEx1115[Pegl-46::GFP]</i>                                                                                                                                                                                                                 | Cross                             | CGC and this study | Fig. S1G                     |
| GOU949      | <i>mig-13(mu225) casIs35[Pgcy-32::mCherry]; muls32[Pmec-7::GFP];</i>                                                                                                                                                                                          | Cross                             | CGC and this study | Fig. S5A                     |
| GOU955      | <i>mig-13(mu225) casIs35[Pgcy-32::mCherry]; mnIs17[osm-6::GFP unc-36(+)]</i>                                                                                                                                                                                  | Cross                             | CGC and this study | Fig. S5B                     |
| GOU978      | <i>casIs179[Pegl-46::MIG-13, Pegl-17::Myri-mcherry::pie-1 3' UTR, Pegl-17::mcherry-TEV-S::his-24]; mnIs17[osm-6::GFP unc-36(+)]</i>                                                                                                                           | Injection and cross               | CGC and this study | Fig. S5B                     |

Strains carrying extrachromosome arrays were exposed to gamma-ray irradiation for integration and were backcrossed with wild-type N2 animals at least three times. *rdvIs1* (Q cell membrane and nuclei marked with mCherry) was constructed previously (1). CGC, *Caenorhabditis* Genetics Center; EMS, ethyl methanesulfonate.

1. Ou G, Stuurman N, D'Ambrosio M, Vale RD (2010) Polarized myosin produces unequal-size daughters during asymmetric cell division. *Science* 330(6004):677–680.



**Table S2. PCR products for *C. elegans* transgenesis**

| PCR product                                                                        | Primer 5'                                                                               | Primer 3'                                                                               | Template                                                             | Reference                                             |
|------------------------------------------------------------------------------------|-----------------------------------------------------------------------------------------|-----------------------------------------------------------------------------------------|----------------------------------------------------------------------|-------------------------------------------------------|
| <i>egl-17 promoter</i><br><i>myr-mCherry</i>                                       | cagatggatg tttactgcc a actgg<br>caggtgcccgaatgtgagct<br>atgggttcct gtattgaaa agtctc     | agctcacatt tcgggcacct gaa<br>ctaaaggaa caaaagctgg agc                                   | N2 genomic DNA<br>pJWZ50.3                                           |                                                       |
| <i>P<sub>egl-17</sub> myr-mCherry</i>                                              | cttcogttot atggaacact c                                                                 | gaatcatcgt tcacttttca cgg                                                               | <i>egl-17 promoter</i> and<br>MYR-mCherry                            | Fig. 3 A and D, and<br>Figs. S1D and S2C              |
| <i>P<sub>egl-17</sub> mCherry::his-24</i>                                          | cttcogttot atggaacact c                                                                 | gaagacgttg aacgtcaaat t atc                                                             | <i>egl-17 promoter</i> and<br>mCherry + his-24                       | Fig. 3 A and D, and<br>Figs. S1D and S2C              |
| <i>P<sub>gcy-32</sub></i>                                                          | cacattatatac gatcggagcatg                                                               | caccctttgagaccattctat<br>aatacaatcgtgatcctcg                                            | N2 genomic DNA                                                       |                                                       |
| mCherry<br><i>mig-13+3' UTR</i>                                                    | atggtctcaaagggtgaagaagataac<br>CCAGCATGAGCCGTAGACGAA<br>tgactaaactactcatagc             | AAGGCCCCGTACGGCCGACTAGTAGG<br>ataaacgaattcaatgcgac                                      | pPD49.26-mCherry<br>N2 genomic DNA                                   |                                                       |
| <i>P<sub>egl-13</sub></i><br><i>P<sub>egl-13::mig-13</sub></i>                     | TCACCTGCCCCGACATTA<br>GAGTGTGTGACACCTTGAG                                               | TCGTCTACGGCTCATGCTGG<br>ataaacgaattcaatgcgac                                            | N2 genomic DNA<br><i>mig-13+3' UTR</i> and <i>P<sub>egl-13</sub></i> | Fig. 2 B–D and<br>Fig. S3 C and D                     |
| <i>cor-1+3' UTR</i>                                                                | ACATGGACAGCGAGGTGGAGGTACTAT<br>GGCGAAATCGTCCGGCAGAG                                     | CCATTTATTAGTTGCAATAC                                                                    | N2 genomic DNA                                                       |                                                       |
| <i>P<sub>egl-17::cor-1</sub></i>                                                   | CTTCCGTTCTATGGAACACTC                                                                   | GGTTGCAATACAATACAACACAC                                                                 | <i>cor-1+3' UTR</i> and <i>P<sub>egl-17</sub></i>                    | Fig. 3 A–E and<br>Fig. S2 A–D and<br>Movies S3 and S7 |
| <i>P<sub>mec-7</sub></i><br><i>P<sub>mig-13</sub></i><br><i>P<sub>unc-47</sub></i> | ggtggagaacgtcatgaaattacg<br>tctctgcagtgttacacg<br>CGCGGTTTTGGCGCG<br>gtttcccgaggtctacgc | gttgcttgaaatgtggacc<br>ttcctactgtccaaaccg<br>gagttagtttagtcatctgt<br>aatgaataaatgtgacgc | N2 genomic DNA<br>N2 genomic DNA<br>N2 genomic DNA                   |                                                       |

**Table S3. Plasmids constructed for *C. elegans* transgenesis**

| Plasmid name                                          | Primer 5'                                   | Primer 3'                                          | Notes                                                                                                                                                        | Reference                               |
|-------------------------------------------------------|---------------------------------------------|----------------------------------------------------|--------------------------------------------------------------------------------------------------------------------------------------------------------------|-----------------------------------------|
| pPD95.77-Pegl-17::GFP                                 | TTTTTCTACCGGTACC<br>CTCAAGGG                | AGACCCAAGCTTGGTACCAT<br>GAGTAAAGGAGAAGAAGACTTTTCAC | <i>Pegl-17</i> sequence was amplified from N2 genomic DNA and inserted into pPD95.77 plasmid via In-fusion advantage PCR cloning kit                         |                                         |
| pPD95.77-Pegl-17::<br>mouse_mig-13_cDNA1::GFP         | ccagcgacgggccatagctca<br>catttcggggcacctgaa | taagaacaaccgctgATGA<br>GTAAAGGAGAAGAAC             | Mouse_mig-13 cDNA1 was amplified from mouse cDNA library and inserted into pPD95.77-Pegl-17::GFP via In-fusion advantage PCR cloning kit                     |                                         |
| pPD95.77-Pegl-17::<br>mouse_mig-13_cDNA2::GFP         | ccactgtaagaacaaccgctg                       | gctttgctgctgtgtATG<br>AGTAAAGGAGAAGAAC             | Mouse_mig-13 cDNA2 was amplified from mouse cDNA library and inserted into pPD95.77-Pegl-17::mouse_mig-13_cDNA1::GFP via In-fusion advantage PCR cloning kit | Fig. 1E and Fig. S3B                    |
| pCF95-Pmig-13::<br>mouse_mig-13_cDNA::GFP             | ccagcgacgggccattacct<br>gaaattctgaaattaaatg | GTACCGGTAGAAAAA<br>ccctgacactaagtt                 | Mouse_mig-13 cDNA was amplified from pPD95.77-Pegl-17::mouse_mig-13_cDNA::GFP and inserted into pCF95 via In-fusion advantage PCR cloning kit                | Fig. 1E and Fig. S3B                    |
| pPD49.26-Pmig-13::mig-13                              | cgtgtaacactgcagaga<br>TGCAAGCTTGCGTAATC     | gtgcattgaattcgttat<br>GACGGTACCATGGTATTG           | <i>Pmig-13::mig-13</i> sequence was amplified from N2 genomic DNA and inserted into pPD49.26 plasmid via In-fusion advantage PCR cloning kit                 |                                         |
| pPD49.26-Pgcy-32::mig-13                              | cgattgtattatagaat<br>gactaaactactcatagc     | atcgtatataatgtg<br>TGCAAGCTTGCGTAATC               | <i>Pgcy-32</i> sequence was amplified from N2 genomic DNA and inserted into pPD49.26-Pmig-13::mig-13 plasmid via In-fusion advantage PCR cloning kit         | Fig. 2 B–D and Fig. S3 C and D          |
| pPD49.26-Pegl-46::mig-13                              | ggaaaacatctggaa<br>TGCAAGCTTGCGTAATC        | tgatttcagaagccA<br>tgactaaactactcatagc             | <i>Pegl-46</i> sequence was amplified from N2 genomic DNA and inserted into pPD49.26-Pmig-13::mig-13 plasmid via In-fusion advantage PCR cloning kit         | Figs. 2 B–D and 4D, and Fig. S3 C and D |
| pPD49.26-Pmig-13::mig-13::<br>TEV-S::GFP_mig-13_3'UTR | gagtagattacgatgtacatc                       | GATGAACTATACAAAataaaat<br>ctgttctttaattttc         | TEV-S::GFP was amplified by soeing PCR and inserted into pPD49.26-Pmig-13::mig-13 via In-fusion advantage PCR cloning kit                                    | Fig. S1D                                |
| pPD49.26-Pmec-7::mig-13::<br>TEV-S::GFP_mig-13_3'UTR  | atgacgttctccacc<br>TGCAAGCTTGCGTAATC        | caaatttcaagcaacAt<br>gactaaactactcatagc            | <i>Pmec-7</i> sequence was amplified from N2 genomic DNA and inserted into pPD49.26-Pmig-13::mig-13::TEV-S::GFP_mig-13_3'UTR                                 | Fig. 2 B–D and 4D, and Fig. S3 C and D  |
| pPD95.77-DePmig-13A::<br>mig-13::GFP                  | AGGTGACCACCACAAACACC<br>GTTTCTTTTTGTCAAC    | TTGTGGTGGTCACCTGTGCGA                              | pCF95(MIG-13::GFP) plasmid was used to amplify sequence deleting Pmig-13A. then it was circled by In-fusion advantage PCR cloning kit                        | Fig. 4C                                 |

Table S3. Cont.

| Plasmid name                                               | Primer 5'                               | Primer 3'                                   | Notes                                                                                                                                              | Reference                          |
|------------------------------------------------------------|-----------------------------------------|---------------------------------------------|----------------------------------------------------------------------------------------------------------------------------------------------------|------------------------------------|
| pPD95.77- <i>DePmig-13B</i> ::<br><i>mig-13</i> ::GFP      | TAGTGTGGTGATAACGAAG<br>AAGGGGGGGGGTCTA  | GTTATCACCACACTAGAAG                         | pCF95(MIG-13::GFP) plasmid was used to amplify sequence deleting <i>Pmig-13B</i> . then it was circled by In-fusion advantage PCR cloning kit      | Fig. 4C                            |
| pPD95.77- <i>DePmig-13C</i> ::<br><i>mig-13</i> ::GFP      | CCTCTCCCTTGTAGTCATA<br>ATTCTAGGCCAGGG   | CTAACAAGGAGAGGTCTATG                        | pCF95(MIG-13::GFP) plasmid was used to amplify sequence deleting <i>Pmig-13C</i> . then it was circled by In-fusion advantage PCR cloning kit      | Fig. 4C                            |
| pPD95.77- <i>DePmig-13 motif</i> ::<br><i>mig-13</i> ::GFP | ATCGTATAGTCAATTAATT<br>AGGCCGACTGTCG    | AATTGACTATACGATTGA<br>GTGTTAATGTGCCG        | pCF95(MIG-13::GFP) plasmid was used to amplify sequence deleting <i>Pmig-13 motif</i> . then it was circled by In-fusion advantage PCR cloning kit | Fig. 4C                            |
| pPD95.77- <i>lin-39</i> ::GFP                              | ATGACCACATCAACATCACCG                   | TTCTCCTTTACTCATGAATTGA<br>TTGAAAAGTGGGAACC  | <i>lin-39</i> cDNA was amplified and inserted into pPD95.77                                                                                        |                                    |
| pPD95.77- <i>Pmec-7</i> ::<br><i>lin-39</i> ::GFP          | GTACCGGTAGAAAAA<br>ttccagatgttttccttccg | TGTTGATGTGGTCATggcct<br>tctgaaatcaaaacg     | <i>Pmec-7</i> was amplified and inserted into pPD95.77- <i>lin-39</i> ::GFP                                                                        | Fig. 5 C<br>and D                  |
| pPD95.77- <i>Pgcy-32</i> ::<br><i>lin-39</i> ::GFP         | GTACCGGTAGAAAAAcacat<br>tatatacgcgagggc | TGTTGATGTGGTCAtctata<br>atacaatcgtgatcttcgc | <i>Pgcy-32</i> was amplified and inserted into pPD95.77- <i>lin-39</i> ::GFP                                                                       | Fig. 5 C<br>and D                  |
| pPD95.77- <i>Pegl-13</i> ::<br><i>lin-39</i> ::GFP         | GTACCGGTAGAAAAATCA<br>CCTGCCCGACATTA    | TGTTGATGTGGTCATTCTGTC<br>TACGGCTCATGCTGG    | <i>Pegl-13</i> was amplified and inserted into pPD95.77- <i>lin-39</i> ::GFP                                                                       | Fig. 5 C<br>and D                  |
| pCF95- <i>Punc-47</i> ::<br><i>MIG-13</i> ::GFP            | CGCGCCAAAACCGCG<br>GTCTAGAG             | atgactaaactactc<br>atagctctcatcc            | <i>Punc-47</i> was amplified from N2 genomic DNA and inserted into pCF95                                                                           | Fig. 2 B<br>and C, and<br>Fig. S3C |

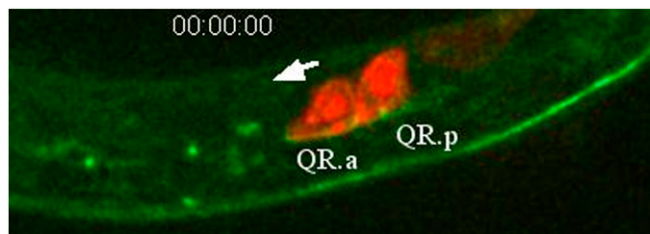

**Movie S1.** MIG-13::GFP in QR.x migration. Transgenic *C. elegans* strain (GOU263) expressing GFP-tagged MIG-13 (green) and mCherry in Q cells (red). Images were taken by time-lapse fluorescence microscope (Axio Observer Z1 microscope; Carl Zeiss) attached to a spinning disk confocal scan head (Yokogawa CSU-X1 Spinning Disk Unit). The arrow in the first frame shows the WT migration direction. Cell names are adjacent. The anterior of the animal is toward the *Left*. Frames were taken every 40 s for 194 min. The display rate is 7 frames per second. The time stamp on the movie indicates hours:minutes:seconds.

[Movie S1](#)

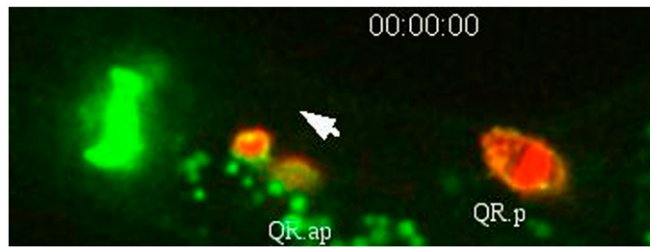

**Movie S2.** MIG-13::GFP in QR.x migration. Transgenic *C. elegans* strain (GOU649) expressing GFP-tagged MIG-13 (green) and mCherry in Q cells (red). Images were taken by time-lapse fluorescence microscope (Axio Observer Z1 microscope; Carl Zeiss) attached to a spinning disk confocal scan head (Yokogawa CSU-X1 Spinning Disk Unit). The arrow in the first frame shows the WT migration direction. Cell names are adjacent. The anterior of the animal is toward the *Left*. Frames were taken every 40 s for 72 min. The display rate is 7 frames per second. The time stamp on the movie indicates hours:minutes:seconds.

[Movie S2](#)

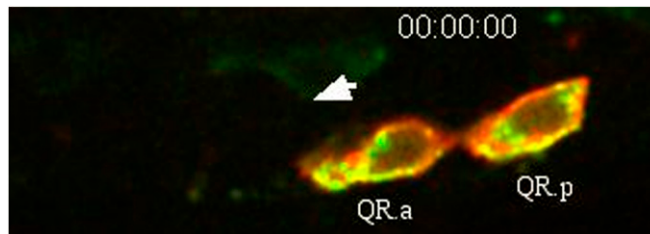

**Movie S3.** COR-1::GFP in QR.x migration. Transgenic *C. elegans* strain (GOU347) expressing GFP-tagged COR-1 (green) and mCherry in Q cells (red). Images were taken by time-lapse fluorescence microscope (Axio Observer Z1 microscope; Carl Zeiss) attached to a spinning disk confocal scan head (Yokogawa CSU-X1 Spinning Disk Unit). The arrow in the first frame shows the WT migration direction. Cell names are adjacent. The anterior of the animal is toward the *Left*. Frames were taken every 60 s for 65 min. The display rate is 7 frames per second. The time stamp on the movie indicates hours:minutes:seconds.

[Movie S3](#)

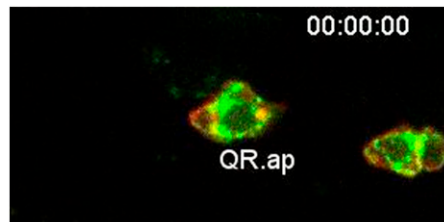

**Movie S4.** COR-1::GFP in QR.x migration of *mig-2(mu28)* mutant. Transgenic *C. elegans* strain (GOU890) expressing GFP-tagged COR-1 (green) and mCherry in Q cells (red). Images were taken by time-lapse fluorescence microscope (Axio Observer Z1 microscope; Carl Zeiss) attached to a spinning disk confocal scan head (Yokogawa CSU-X1 Spinning Disk Unit). The arrow in the first frame shows the WT migration direction. Cell names are adjacent. The anterior of the animal is toward the *Left*. Frames were taken every 60 s for 111 min. The display rate is 7 frames per second. The time stamp on the movie indicates hours:minutes:seconds.

[Movie S4](#)

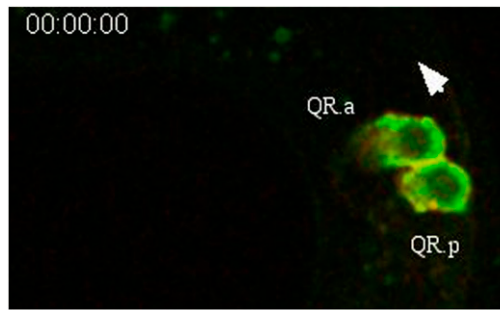

**Movie S5.** COR-1::GFP in QR.x migration of *mig-2(rh17)* mutant. Transgenic *C. elegans* strain (GOU350) expressing GFP-tagged COR-1 (green) and mCherry in Q cells (red). Images were taken by time-lapse fluorescence microscope (Axio Observer Z1 microscope; Carl Zeiss) attached to a spinning disk confocal scan head (Yokogawa CSU-X1 Spinning Disk Unit). The arrow in the first frame shows the WT migration direction. Cell names are adjacent. The anterior of the animal is toward the *Left*. Frames were taken every 40 s for 186 min. The display rate is 7 frames per second. The time stamp on the movie indicates hours:minutes:seconds.

[Movie S5](#)

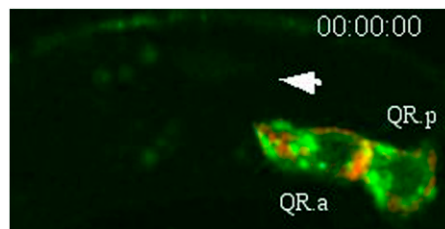

**Movie S6.** COR-1::GFP in QR.x migration of *ina-1(gm144)* mutant. Transgenic *C. elegans* strain (GOU420) expressing GFP-tagged COR-1 (green) and mCherry in Q cells (red). Images were taken by time-lapse fluorescence microscope (Axio Observer Z1 microscope; Carl Zeiss) attached to a spinning disk confocal scan head (Yokogawa CSU-X1 Spinning Disk Unit). The arrow in the first frame shows the WT migration direction. Cell names are adjacent. The anterior of the animal is toward the *Left*. Frames were taken every 60 s for 102 min. The display rate is 7 frames per second. The time stamp on the movie indicates hours:minutes:seconds.

[Movie S6](#)

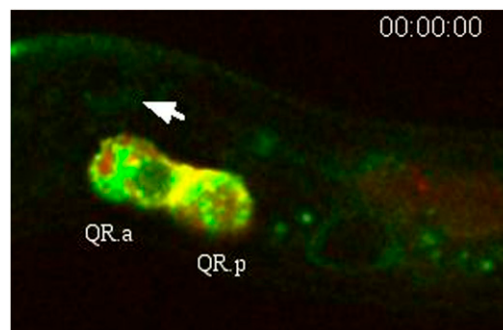

**Movie S7.** COR-1::GFP in QR.x migration of *mig-13(cas15)* mutant. Transgenic *C. elegans* strain (GOU422) expressing GFP-tagged COR-1 (green) and mCherry in Q cells (red). Images were taken by time-lapse fluorescence microscope (Axio Observer Z1 microscope; Carl Zeiss) attached to a spinning disk confocal scan head (Yokogawa CSU-X1 Spinning Disk Unit). The arrow in the first frame shows the WT migration direction. Cell names are adjacent. The anterior of the animal is toward the *Left*. Frames were taken every 60 s for 151 min. The display rate is 7 frames per second. The time stamp on the movie indicates hours:minutes:seconds.

[Movie S7](#)



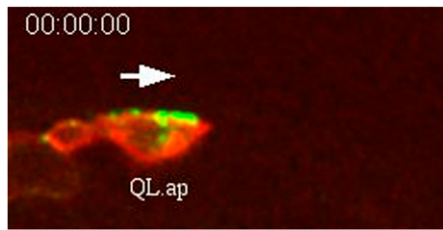

**Movie S8.** COR-1::GFP in QL.ap migration. Transgenic *C. elegans* strain (GOU347) expressing GFP-tagged COR-1 (green) and mCherry in Q cells (red). Images were taken by time-lapse fluorescence microscope (Axio Observer Z1 microscope; Carl Zeiss) attached to a spinning disk confocal scan head (Yokogawa CSU-X1 Spinning Disk Unit). The arrow in the first frame shows the WT migration direction. Cell names are adjacent. The anterior of the animal is toward the *Left*. Frames were taken every 60 s for 90 min. The display rate is 7 frames per second. The time stamp on the movie indicates hours:minutes:seconds.

[Movie S8](#)

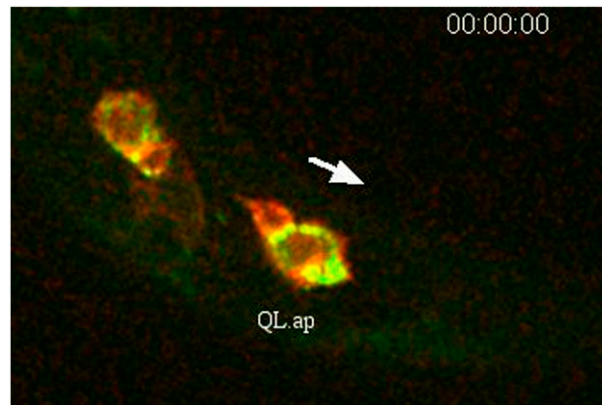

**Movie S9.** COR-1::GFP in QL.ap migration with *mig-13* ectopic expression. Transgenic *C. elegans* strain (GOU482) expressing GFP-tagged COR-1 (green) and mCherry in Q cells (red). Images were taken by time-lapse fluorescence microscope (Axio Observer Z1 microscope; Carl Zeiss) attached to a spinning disk confocal scan head (Yokogawa CSU-X1 Spinning Disk Unit). The arrow in the first frame shows the WT migration direction. Cell names are adjacent. The anterior of the animal is toward the *Left*. Frames were taken every 60 s for 121 min. The display rate is 7 frames per second. The time stamp on the movie indicates hours:minutes:seconds.

[Movie S9](#)

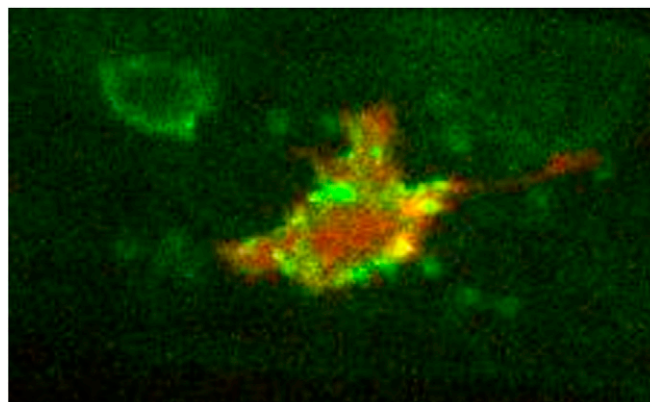

**Movie S10.** COR-1::GFP during QR.x migration of *lin-39(n1760)* mutant. Transgenic *C. elegans* strain (GOU988) expressing mCherry in Q cells (red). Images were taken by time-lapse fluorescence microscope (Axio Observer Z1 microscope; Carl Zeiss) attached to a spinning disk confocal scan head (Yokogawa CSU-X1 Spinning Disk Unit). The arrow in the first frame shows the WT migration direction. Cell names are adjacent. The anterior of the animal is toward the *Left*. Frames were taken every 60 s for 61 min. The display rate is 7 frames per second. The time stamp on the movie indicates hours:minutes:seconds.

[Movie S10](#)

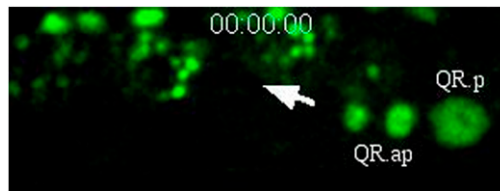

**Movie S11.** LIN-39::GFP in QR.x migration. Transgenic *C. elegans* strain (GOU785) expressing GFP-tagged LIN-39 (green) and mCherry in Q cells (red). Images were taken by time-lapse fluorescence microscope (Axio Observer Z1 microscope; Carl Zeiss) attached to a spinning disk confocal scan head (Yokogawa CSU-X1 Spinning Disk Unit). The arrow in the first frame shows the WT migration direction. Cell names are adjacent. The anterior of the animal is toward the *Left*. Frames were taken every 60 s for 99 min. The display rate is 7 frames per second. The time stamp on the movie indicates hours:minutes:seconds.

[Movie S11](#)

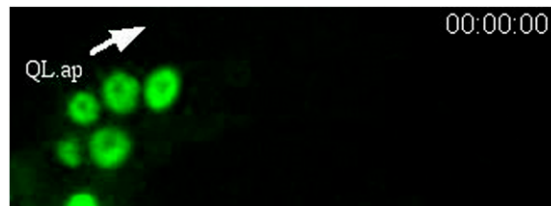

**Movie S12.** LIN-39::GFP in QL.x migration. Transgenic *C. elegans* strain (GOU785) expressing GFP-tagged LIN-39 (green) and mCherry in Q cells (red). Images were taken by time-lapse fluorescence microscope (Axio Observer Z1 microscope; Carl Zeiss) attached to a spinning disk confocal scan head (Yokogawa CSU-X1 Spinning Disk Unit). The arrow in the first frame shows the WT migration direction. Cell names are adjacent. The anterior of the animal is toward the *Left*. Frames were taken every 60 s for 135 min. The display rate is 7 frames per second. The time stamp on the movie indicates hours:minutes:seconds.

[Movie S12](#)
